# Supplementary material for: HIV Vpr induces demethylation of the SNCA antisense promoter leading to neurocognitive impairment
Source: Research Square preprint supplement (doi:10.21203/rs.3.rs-6405901/v1), 2025-11-01
Supplement: Supplementary file [file 680b7e5c9796693fa3f313f9.pdf]

## SUPPLEMENT

| Patient ID | Age | Normal=0<br>Pre-HAART=1<br>Post-HAART=2 | Neuropathology                                           |
|------------|-----|-----------------------------------------|----------------------------------------------------------|
| 7101958083 | 46  | 0                                       | Normal                                                   |
| 7101198377 | 34  | 0                                       | Normal                                                   |
| OBB351-1   | 33  | 0                                       | Normal                                                   |
| OBB119-1   | 45  | 0                                       | Normal                                                   |
| OBB349-2   | 50  | 0                                       | Normal                                                   |
| OBB173-1   | 40  | 0                                       | Normal                                                   |
| OBB154-1   | 35  | 0                                       | Normal                                                   |
| OBB227-1   | 33  | 0                                       | Normal                                                   |
| OBB325-1   | 47  | 0                                       | Normal                                                   |
| OBB376-1   | 38  | 0                                       | Normal                                                   |
| OBB329-2   | 46  | 0                                       | Normal                                                   |
| OBB167-1   | 52  | 1                                       | Alzheimer type 2 gliosis                                 |
| OBB238-1   | 33  | 1                                       | Cerebral atrophy                                         |
| OBB003-3   | 36  | 1                                       | Normal                                                   |
| OBB305-1   | 40  | 1                                       | Microglial nodules                                       |
| OBB120-3   | 40  | 1                                       | Focal ischemic neuronal necrosis and Bergmann gliosis    |
| OBB083-1   | 50  | 1                                       | Bergman's gliosis, Acute neuronal changes                |
| OBB110-1   | 44  | 1                                       | Meningitis, brain hernia, cerebral edema                 |
| OBB192-2   | 40  | 1                                       | Multiple lesions with gliosis and necrosis               |
| OBB297-2   | 39  | 1                                       | HIV encephalitis, microglial nodules                     |
| OBB341-1   | 48  | 1                                       | HIV encephalitis                                         |
| OBB151-1   | 48  | 1                                       | Chronic meningoencephalitis                              |
| 4049       | 44  | 2                                       | Other non-infectious pathology                           |
| 7102066884 | 50  | 2                                       | Other non-infectious pathology                           |
| 4002       | 35  | 2                                       | Alzheimer type 2 gliosis, other non-infectious pathology |
| 6078       | 37  | 2                                       | Alzheimer type 2 gliosis, aseptic leptomeningitis        |
| 6037       | 41  | 2                                       | Minimal non-diagnostic abnormalities                     |
| 7100696768 | 42  | 2                                       | Microglial nodule encephalitis                           |
| 7200116866 | 35  | 2                                       | Alzheimer type 2 gliosis, focal infarct                  |
| MHBB500    | 47  | 2                                       | HIV encephalitis                                         |
| 10162      | 42  | 2                                       | Microglial nodule encephalitis                           |
| CE102      | 48  | 2                                       | HIV encephalitis                                         |
| CA235      | 46  | 2                                       | Microglial nodule encephalitis                           |

**Table S1.** Case-level metadata for human brain samples used in Figure 4 analyses. De-identified repository ID, age (years), HIV/ART group (0 = HIV– control; 1 = HIV+ pre-ART; 2 = HIV+ post-ART), and repository neuropathology summary are shown. n = 33 male donors (HIV–, n = 11; HIV+ pre-ART, n = 11; HIV+ post-ART, n = 11); age range 33–52 years. Tissues were obtained from the National NeuroAIDS Tissue Consortium (NNTC). Neuropathology terms reflect repository summaries. Only age, sex, HIV/ART status, and brief neuropathology were available; broader comorbidity, ART regimen, and viral load data were not provided.

| PID | group  | age | gender | Brain area  | % nuclei with SAHF | % deshaped nuclei |
|-----|--------|-----|--------|-------------|--------------------|-------------------|
| 1   | Normal | 35  | M      | Temporal    | 10.41              | 1.36              |
| 2   | Normal | 48  | M      | Temporal    | 4.86               | 7.32              |
| 3   | Normal | 50  | M      | Temporal    | 48.39              | 4.43              |
| 4   | HIV    | 34  | M      | Temporal    | 48.25              | 13.99             |
| 5   | HIV    | 36  | M      | Temporal    | 27.58              | 13.68             |
| 6   | HIV    | 48  | M      | Temporal    | 18.08              | 52.13             |
| 7   | Normal | 45  | M      | Frontal     | 20.29              | 4.35              |
| 8   | Normal | 46  | M      | Frontal     | 25.43              | 0.87              |
| 9   | HIV    | 46  | M      | Frontal     | 49.65              | 1.42              |
| 10  | HIV    | 47  | M      | Frontal     | 45.88              | 16.67             |
| 11  | Normal | 45  | M      | Hippocampus | 7.93               | 3.66              |
| 12  | Normal | 46  | M      | Hippocampus | 25.64              | 2.56              |
| 13  | HIV    | 46  | M      | Hippocampus | 52.57              | 0.57              |
| 14  | NFT    | 63  | M      | Temporal    | 65.43              | 4.86              |
| 15  | AD     | 69  | M      | Temporal    | 70.71              | 7.86              |

**Table S2.** Case-level senescence and nuclear morphology metrics in human brain tissue. De-identified male donors (n=15; ages 34-69) across diagnostic groups (Normal, HIV, NFT, AD) and brain regions (temporal, frontal, hippocampus). Columns list patient ID (PID), group, age, gender, brain area, percent nuclei with senescence-associated heterochromatin foci (% SAHF), and percent de-shaped nuclei. SAHF were defined as DAPI-dense, punctate heterochromatin foci within nuclei; de-shaped nuclei were defined by irregular nuclear contours (non-elliptical morphology). For each case/region,  $\geq 10$  non-overlapping fields were scored by a blinded rater, and values are reported as the mean percentage per case. These data provide an orthogonal readout of cellular stress/senescence in the same regions analyzed for SNCA methylation and  $\alpha$ -synuclein, supporting the link between Vpr-associated stress, epigenetic remodeling, and neurodegeneration. Abbreviations: SAHF, senescence-associated heterochromatin foci; NFT, neurofibrillary tangles; AD, Alzheimer's disease.
